# Supplementary material for: Achilles tendon thickness and serum asprosin level significantly increases in patients with polycystic ovary syndrome
Source: PeerJ. 2024 Aug 22;12:e17905. doi: 10.7717/peerj.17905 (PMC11345002; doi:10.7717/peerj.17905)
Supplement: Supplemental Information 1 [file peerj-12-17905-s001.xlsx]

## Sheet: pcos asporsin dergi istedi
GROUP	Age	BMI	Pulse	SBP	DBP	GLUCOSE	ALT	AST	Triglyceride	HDL	Sodium	Potassium	Creatinine	Calcium	TSH	CRP	LDL	DHEAS	LH/FSH ratio	Testosterone	AMH	Wbc	Hemoglobin	Platelet	HOMA-IR	Asprosin	Achilles tendon thickness	Achilles tendon width
1	27	22.7615	76	125	79	67	31	44									139	391.6	2.21	95	11	6.3	12	400	2.7	70	6	13
1	27	33.564	78	136	80	80	30	34								0.1	157	600	2.3	104	3.3	6	9.6	214	3.12	54	4.9	16
0	22	22.7615	82	115	80	80	15	18	120		140	4.5	0.5	9.6	2.218	0.3	104.2	50.8	0.9	69	1	5.2	14.1	277	1.99	51.5	4.3	12.6
1	22	27.4077	78	123	70	80	18	18	89	33	138	4.2	0.5	9.5	0.88	0.1	121	257.2	1.5	87	9.5	7.1	11.9	261	2.2	47	4	14
0	35	24.2764	99	116	77	80	13	23	100	34	137	4.2	0.99	9.4	2.193	0.2	120	50.8	0.78	57	2.16				1.94	51.5	4.8	16
1	27	22.3214	70	118	75	70	10	15	90	35	138	4.3	0.5	9	0.85	0.3	77	612	2.32	106	13	7.1	12.3	209	2.3	70	6	15.9
0	33	22.3214	68	119	79	80	16	19	185	37	139	4.65	0.94	10.1	2.218	0.3	115.1	89.2	0.76	40	1	8.8	12.7	350	1.6	49.5	5	15.9
0	31	23	72	114	87	70	12	15	100	38	139	4.2	0.5	9	1.72	0.1	137.8	84.4	0.84	41	2.1	5.2	14.1	277	1.6	51.5	4.9	12.2
0	18	23	82	110	77	78	10	29	215	39	135	4.8	0.94	10.2	1.179	0.1	91.7	70	0.82	61	1	5.4	12.3	255	2.04	49.51	4.5	13
1	29	28.3848	96	117	95	81	13.8	15.5	98	39	140	4.4	0.55	9.8	2.52	0.2	78.1	65.2	0.8	48	1.99	4.9	12.9	311	2.11	43	4.8	13
1	29	28.3848	96	110	70	80	42	11	99	39.1	139.5	4.45	0.55	9.9	2.529	0.2	178	218.8	1	79	3.9	4.9	12.8	310	2.1	49	5.8	12.2
1	34	23.3067	89	116	95	80	17.8	21.9	433	39.2	138	4.43	0.69	9.8	2.581	0.4	287.2	74.8	0.33	81	1.9	7.1	13.1	453	2.2	54	4.7	12.6
1	34	24.6755	79	116	80	80	23	19.7	115	39.8	139.3	4.23	0.45	9.6	1.469	0.18	132	454	2.24	98	9	6.5	14.4	345	3	50	5.3	12.2
0	27	23.3067	70	120	79	80	13	22	111	40	137	3.96	0.73	9.7	1.781	0.4	158.2	55.6	0.79	58	2.17	5.2	14.1	277	2	41.5	4.7	12.8
0	30	26.5021	76	111	77	92.1	15	13	90	40	141	4.3	0.4	8.9	2.244	0.1	98.9	84.4	0.66	51	2	6.2	13	262	1.5	45	5.3	13
0	36	22.7615	76	118	80	75	13	17	81	41	140	4.41	0.53	8.7	0.85	0.1	99	60.4	0.8	59	2.18	8.8	12.7	350	2	40	4.6	12.6
1	31	20.8117	73	118	80	80	10.5	11	148	41.5	138.3	4.57	0.67	9.7	1.719	0.37	163	209.2	0.98	77	3.7	7.9	13.2	279	2.1	43	4.4	12.6
1	30	37.6378	80	124	78	75	23.3	21.6	168	41.7	139.9	4.45	0.53	9	3.515	0.1	95	252.4	1.49	86	4.6	3.4	9.6	217	2.2	45	4	14
1	30	19.2894	80	120	90	80	23.3	21.6	168	41.7	139.9	4.45	0.53	10.3	3.515	0.1	116.7	89.2	0.41	47	1.95	3.4	9.6	217	2.2	51.5	4.4	16
0	27	26.5021	70	120	80	75	22	11	148	43	138	3.8	0.5	9.4	1.136	0.1		60.4	0.4	46	1.93	5.4	12.3	255	1.01	44.6	5.8	16.1
1	22	19.5312	78	125	80	99	15.2	17.2	236	43.9	138.5	4.45	0.69	9.8	5.199	0.2	78	287.6	1.53	90	12.5	7.52	13.4	240	3.3	67	5.9	16.1
0	30	23.3726	78	119	75	85	14	15	135	44	139	4.31	0.64	9.3	3.627	0.2	127.4	84.4	0.85	64	2.25	5.9	12.4	320	2.01	42.5	4	12.2
1	27	30.6667		115	79	79	21.3	26.1	148	44.5	138.4	4.52	0.53	9.6	3.457	0.1	118	636	2.36	110	4.5	5.4	13	260	2.1	54	4.7	16
1	27	30.6667	68	116	80	85	21.3	26.1	148	44.5	138.4	4.52	0.53	9.6	3.457	0.1	118.6	636	2.36	110	4.9	8.3	14.8	279	2.2	43	5.1	16
1	36	26.1224	70	111	80	99	17.5	20.8	55	44.7	140.5	3.84	0.57	9.6	2.259	0.3	105	262	1.51	88	15	5	12.6	432	2.22	55	4	12.2
0	22	24.6755	80	117	76	100	15	14	90	45	140	4.1	0.5	9	2.581	0.2	130.8	89.2	0.8	52	2	5.3	13.3	263	1.5	49.5	5.2	12.6
1	36	26.5021	98	114	92	80	11.9	18	106	46.8	141	4.13	0.67	9.4	1.05	0.1	120	79.6	0.4	45	1.93	7.4	14.1	314	2.2	49.5	4.5	15.9
1	27	23.3726	85	120	80	99	19	19.7	103	46.9	139	4.26	0.47	9.9	2.193	0.1	105	475.3	2.26	100	5.5	8.5	15.9	221	3.12	48	5.7	15.9
0	22	23.3067	78	119	75	80	19	16	89	47	139	4.2	0.5	9.4	1.209	0.1	161	70	0.41	48	1.94	4.8	12.3	326	1.01	44	5.6	12.8
1	31	23.6652	80	118	85	99	13.3	17.9	68	47.6	139.2	3.98	0.63	9.8	1.756	0.1	104	266.8	1.52	89	8	6.6	13.7	300	3.4	58	4	15.9
0	31	23.3067		120	80	85	14	12	146	48	135	4.1	0.5	9.6		0.4	111.2	46	0.24	43	1.8				1	41.5	4	12.4
1	29	28.5483	77	100	85	98	10.7	16.4	111	48.3	140.3	4.72	0.82	9.5	1.679	0.2	115	582	2.27	101	6	6.9	17.9	216	3.12	49	5.6	16.1
1	31	21.2585	76	117	80	80	13.2	18.6	119	49.7	138.7	4.97	0.57	9.8	2.545	0.1	111	618	2.33	107	7	8.4	12.3	256	2.27	48.5	5.2	16.1
1	31	22.9421	80	115	79	80	13.2	18.6	119	49.7	138.7	4.97	0.57	9.8	2.545	0.1	154	74.8	0.33	46	1.94	5.6	12.9	330	1.1	54	4.9	12.8
1	31	18.3655	84	114	68	80	10.6	15.8	228	49.9	140.2	3.79	0.69	9.3	2.369	0.52	160	194.8	0.95	74	4.3	5.2	13.3	220	2	54	4.5	12.6
0	34	19.2894	82	120	81	78	12	21	76	50	135	4.09	0.51	8.7	2.545	0.1	136.9	79.6	0.83	53	2.1	5.3	13.3	263	1.57	49.51	5.1	12.4
0	31	22.9421	80	111	85	67	11	13	100	50	138	4.99	0.54	10.3	1.136	0.3	108.6	65.2	0.81	60	2.19	8.1	11.7	343	2.03	49.5	4.5	14
1	31	22.7615	84	115	93	79	6.9	14	36	51.7	140.5	4.5	0.63	10.1	1.199	0.1	#NULL!	79.6	0.33	43	1.9	7.7	13.3	232	2.2	49	4.6	12.4
1	35	36.1604	106	116	80	79	19.7	19.9	185	52	137.7	4.3	0.6	9.5	0.72	0.1	125	629	2.35	109	5	5.3	11.6	239	2.2	43	4.8	16.1
1	29	19.2894	80	127	85	85	12.4	18.6	103	52	137.9	5.04	0.63	10.6	2.318	0.4	106	474.8	2.25	99	3.5	7.5	14.1	156	3	45	5.2	15.9
0	26	22.7615	90	108	75	79	19	12	72	52	140	4	0.6	8.7	1.719	0.1	161	74.8	0.41	49	1.95	5.9	12.4	320	1	39	5.5	12.6
0	31	22.9421	70	118	78	97	18	16	63	52	141	4.67	0.6	9.7	3.627	0.3	127.4	79.6	0.53	50	1.99	8.8	13.1	280	1.18	42	5.4	14
1	35	22.9421	80	118	78	78	33	17	64	52.5	139.3	4.05	0.67	9	1.983	0.16	122	412.4	2.22	96	3.6	6.3	12	211	3	50	5.5	12.6
1	35	36.1604	72	117	81	80	19.6	20	184	53	136	4.2	0.6	9.4	0.729	0.1	145	630	2.34	108	4.1	5.9	12.2	293	3.3	45	4.9	15.9
1	35	24.6755	106	115	95	80	19.7	19.9	185	53	137.7	4.3	0.6	9.4	0.729	0.1	163.1	84.4	0.4	48	1.99	5.3	11.6	239	3.3	49	5	12.6
0	22	24	66	115	78	80	18	23	84	53	142	4.62	0.6	10	2.244	0.2	112.8	79.6	0.86	65	1.01	8.8	13.1	280	2.02	44	4.5	15.9
1	36	22.8624	72	119	80	67	19	17.9	53	53.1	139.9	3.94	0.72	9.7	1.781	0.1	111.2	588	2.28	102	7.5	3.6	14.7	207	3.12	55	5.5	16
0	29	24.6755	72	120	77	70	12	21	130	55	136	4.13	0.7	9.6	1.209	0.2	110	74.8	0.83	62	2.2	7.9	12.8	265	1.98	51.5	5	12.6
0	30	23.3067	80	116	85	80	15	17	157	55	138	4.05	0.52	9.8	1.72	0.1	120	46	0.89	68	2.5	5.3	13.3	263	2	49.51	4.4	12.8
1	22	23.9361	70	120	65	80	44.3	11	131	55.2	140.8	4.98	0.58	9.9	2.244	0.1		204.4	0.97	76	4.8	5.1	16	286	2.1	45	5	13
1	18	19.2894	70	118	77	75	8.8	14.4	57	57.1	138.5	4.02	0.58	9.8	0.931	0.27	155	60.4	0.66	47	1.95	7.9	13.2	279	2.1	45	4.9	14
1	18	34.6268	70	111	78	75	11	11	57	57.1	138.5	4.02	0.58	9.8	0.931	0.27	168	214	0.99	78	3.8	7.9	13.2	279	2.1	54	4	12.4
1	26	26.5731	68	139	80	80	33	44	64	58.4	140.1	4.47	0.72	10.2	1.209	0.2	100	594	2.29	103	3.4	4	14.4	214	3.12	43	5.1	16.1
1	29	24.2764	80	118	60	75	16	21	73	60	138.6	4.12	0.61	9.4	1.582	0.2	125	624	2.34	108	4	7.8	11.2	189	3.3	49	5	12.2
0	29	21.2585	78	118	77	85	14	17	70	61	139	4.63	0.63	10	0.782	0.2	115.8	46	0.77	56	2.15	8.9	12.6	258	1.83	49.51	4.9	16.1
0	33	24.6755	78	113	80	80	10	18	64	61	141	4.2	0.5	10.1	1.781	0.43	98.2	65.2	0.53	72	1.8	8.9	12.6	258	1.99	51.5	4.1	12.6
0	26	22.8624	70	118	70	80	16	14	136	61	141	4.79	0.7	9.8	2.581	0.1	161	84.4	0.87	66	1	6.2	13	262	2	35	4.4	16.1
1	18	21.875	58	100	80	99	15.7	11	118	62.1	137.1	4.03	0.49	9.7	1.788	0.3	109	350	2.19	93	14.5	7.8	11.2	244	2.3	74	6	12.6
0	30	24.6755	76	119	77	80	18	15	51	64	138	3.8	0.58	9.1	1.179	0.2	106.3	65.2	0.4	47	1.93	7.9	12.8	265	1.02	44.5	5.7	16
1	29	30.0621	82	113	60	85	44	21.4	113	64.3	137.1	4.53	0.51	9.6	2.218	0.16	117	199.6	0.96	75	4.7	4.8	12.3	326	2.1	49	4.5	14
1	26	25.6312	73	110	80	98	16.3	21.5	204	64.9	137	4.15	0.54	9.2	3.699	0.1	90	308.4	1.54	91	10	4	14.1	301	3.3	71	6	16
0	31	26.5731	76	117	80	75	11	18	145	65	142	4.76	0.73	9.6	2.545	0.2	115.8	89.2	0.88	67	2.5	5.3	13.3	263	2.02	49.5	4.3	16
1	30	24.6755	84	113	92	85	8.1	14.4	78	65.4	140.8	4.44	0.62	9.8	1.136	0.2	99.8	84.4	1.48	46	1.94	7.4	14.1	314	2.2	49.51	5	16.1
1	30	47.2656	84	121	92	80	11	11	78	65.4	140.8	4.44	0.62	9.8	1.136	0.2	106	247.6	1.48	85	14	7.4	14.1	314	2.2	54	4	14
1	33	33.0078	77	120	75	91	12.9	11	126	67.9	140.2	4.57	0.45	9.5	4.223	0.1	100	329.2	1.55	92	10.5	4	12.3	256	3.12	67	5.9	12.8
0	34	22.9421	72	120	80	79	13	12	127	68	140	4.5	0.71	8.8	0.782	0.2	77.3	55.6	0.41	70	1.02	8.8	12.7	350	2.03	49.5	4.2	14
0	18	22.7615	78	117	79	80	18	14	55	69	142	4.3	0.5	9.8		0.1	96.2	50.8	0.33	44	1.9				1	40	3.9	12.2
0	31	24	68	114	75	70	28	37	135	71	137	4.51	0.55	10.6	2.193	0.1	134.9	60.4	0.41	71	1.01	8.9	12.6	258	2.04	49.51	4.4	13
1	33	32.2708	66	115	80	78	11.2	18.2	28	72.4	137.6	4.69	0.62	9.8	1.72	0.1	96.2	606	2.31	105	15	7.1	12.3	444	2.3	75	6	12.2
0	29	22.9421	90	120	85	80	29	21	149	73	139	4.2	0.5	8.7	0.85	0.2	136.6	55.6	0.33	45	1.9	8.1	11.7	343	1	47	4	15.9
0	27	19.2894	68	100	76	80	14	35	49	81	142	5.5	0.72	10.1	1.719	0.1	112.8	79.6	0.84	63	2.2	4.8	12.3	326	2.02	43.5	4.4	12.4
1	31	57.0966		120	68	70	18.1	33	93	84	138.6	4.45	0.4	9.9	1.96	0.91	159	190	0.94	73	4.2	5.3	11.6	239	2.01	43	4.6	12.8
1	22	26.5021	70	117	70	70	10.5	18.7	68	84.6	137.9	4.25	0.55	9.9	1.179	0.16	173	433.2	2.23	97	8.5	4.6	11.9	444	3	45	5.4	12.4
1	35	23.3067	98	119	80	95	24.3	30.2	165	89	137.2	4.85	0.66	9	0.782	0.4	108	370.8	2.2	94	13.5	5.9	12.2	293	2.5	72	6	14
1	30	22.9421	70	120	93	70	14.6	33.6	111	91.5	139.2	4.32	0.68	10.2	3.627	0.2	84.1	84.4	0.4	44	1.93	7.7	13.3	232	2.2	39.5	4.5	12.2
